# Supplementary material
Source: MDPI journal article supplement (https://www.mdpi.com/2410-3888/7/3/140)
Supplement: s1 [file s1]

# Supplementary Materials

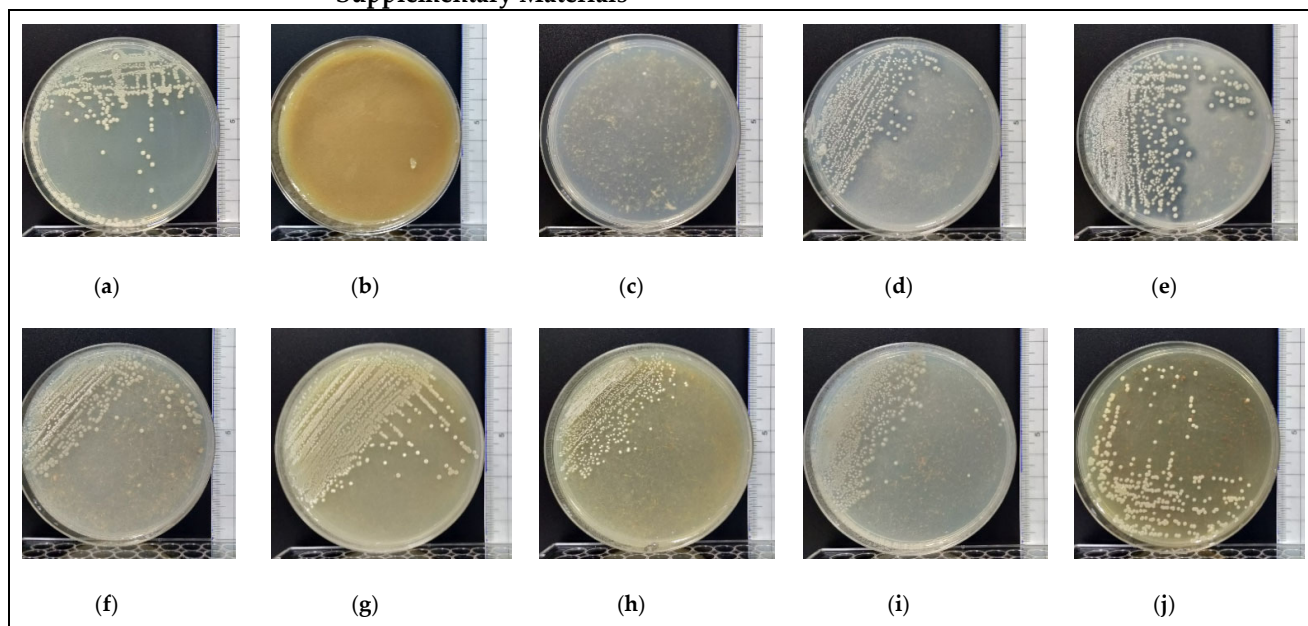

**Figure S1.** The growth of *S. speibonae* TKU048 cells on an agar plate containing 1% of different C/N source ((a) NB, (b) ISP-2, (c) casein, (d) SEW1, (e) SEW2, (f) SHP1, (g) SHP2, (h) SHP3, (i) THP, and (j) TVP), 0.05% MgSO<sub>4</sub>, 1% K<sub>2</sub>HPO<sub>4</sub>, and 2% agar at 37°C for 3 days.

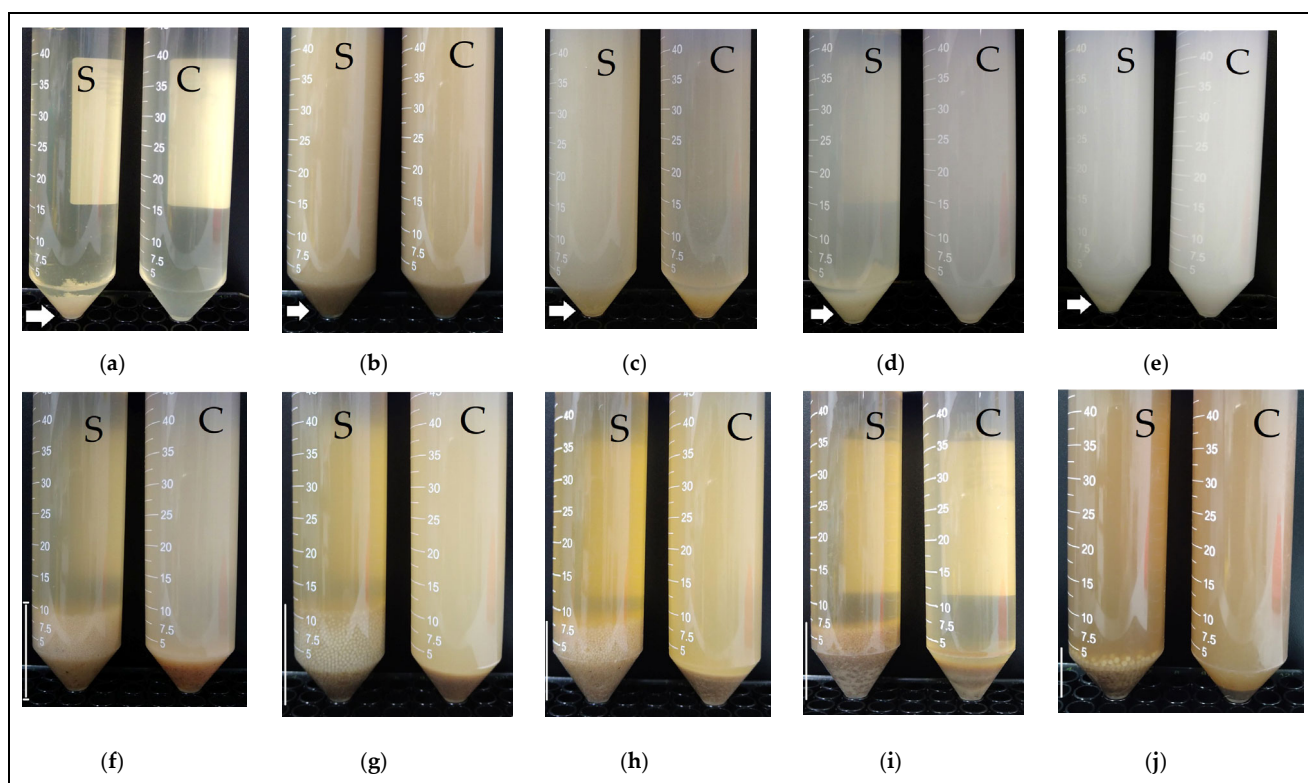

**Figure S2.** Growth of strain *S. speibonae* TKU048 in 50 mL of liquid medium in an Erlenmeyer flask (250 mL) containing 1% of different C/N source ((a) NB, (b) ISP-2, (c) casein, (d) SEW1, (e) SEW2, (f) SHP1, (g) SHP2, (h) SHP3, (i) THP, and (j) TVP), 0.05% MgSO<sub>4</sub>, 1% K<sub>2</sub>HPO<sub>4</sub>, and 2% agar at 37°C for 3 days.

SHP1, (g) SHP2, (h) SHP3, (i) THP, and (j) TVP), 0.05% MgSO<sub>4</sub>, and 1% K<sub>2</sub>HPO<sub>4</sub>, in a shaking incubator at 150rpm for 3 days at 37°C. S: with *S. speibonae* TKU048; C: without *S. speibonae* TKU048.

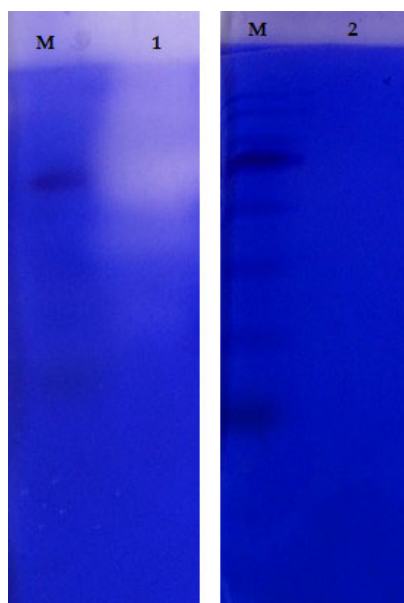

**Figure S3.** In-gel detection of the inhibitory effect of EDTA. M, protein markers; 1, without EDTA; 2, with EDTA.

**Table S1.** DPPH and ABTS radical scavenging activity of the hydrolysates produced by papain, bromelain, and *S. speibonae* TKU048's crude-enzyme cocktail. All data points are means  $\pm$  S.D. of three different replicates.

|       | DPPH radical scavenging activity |                   |                   |                                  | ABTS radical scavenging activity |                  |                  |                                  |
|-------|----------------------------------|-------------------|-------------------|----------------------------------|----------------------------------|------------------|------------------|----------------------------------|
|       | Control                          | Bromalein         | Papain            | TKU048<br>crude enzyme           | Control                          | Bromalein        | Papain           | TKU048<br>crude enzyme           |
| SBP   | 5.46 $\pm$ 3.22                  | 1.62 $\pm$ 2.29   | 5.15 $\pm$ 6.63   | <b>38.14<math>\pm</math>4.72</b> | 6.97 $\pm$ 1.37                  | 28.91 $\pm$ 2.12 | 24.38 $\pm$ 0.98 | 32.96 $\pm$ 0.71                 |
| THP   | 24.94 $\pm$ 2.18                 | 21.47 $\pm$ 1.35  | 38.46 $\pm$ 0.66  | 61.61 $\pm$ 3.96                 | 8.26 $\pm$ 1.93                  | 10.97 $\pm$ 3.72 | 11.66 $\pm$ 3.17 | 27.93 $\pm$ 0.48                 |
| TMP   | 29.92 $\pm$ 3.62                 | 31.35 $\pm$ 2.43  | 57.82 $\pm$ 8.05  | 51.02 $\pm$ 8.76                 | 7.81 $\pm$ 1.04                  | 32.25 $\pm$ 2.82 | 47.00 $\pm$ 3.77 | 53.34 $\pm$ 4.09                 |
| TVP   | 57.60 $\pm$ 6.24                 | 33.24 $\pm$ 3.80  | 61.13 $\pm$ 10.15 | <b>70.73<math>\pm</math>7.39</b> | 44.86 $\pm$ 2.03                 | 57.99 $\pm$ 0.53 | 62.56 $\pm$ 1.86 | <b>74.26<math>\pm</math>3.90</b> |
| TiHP  | 20.70 $\pm$ 5.42                 | 9.09 $\pm$ 2.54   | 31.05 $\pm$ 2.86  | 65.03 $\pm$ 0.19                 | 8.65 $\pm$ 0.95                  | 17.93 $\pm$ 1.86 | 16.31 $\pm$ 4.15 | 23.21 $\pm$ 0.84                 |
| TiMP  | 31.39 $\pm$ 11.51                | 13.50 $\pm$ 11.36 | 29.97 $\pm$ 8.64  | 62.17 $\pm$ 2.34                 | 8.15 $\pm$ 1.00                  | 41.88 $\pm$ 3.66 | 39.38 $\pm$ 1.14 | 47.01 $\pm$ 0.73                 |
| TiVP  | 59.48 $\pm$ 6.97                 | 30.29 $\pm$ 3.72  | 57.07 $\pm$ 6.35  | 69.28 $\pm$ 9.43                 | 21.82 $\pm$ 1.76                 | 19.99 $\pm$ 3.50 | 26.28 $\pm$ 0.43 | 31.76 $\pm$ 0.03                 |
| SHP   | 31.13 $\pm$ 2.12                 | 47.88 $\pm$ 3.45  | 31.87 $\pm$ 5.10  | 61.65 $\pm$ 11.32                | 36.79 $\pm$ 3.08                 | 43.75 $\pm$ 5.55 | 39.73 $\pm$ 3.67 | 58.48 $\pm$ 0.93                 |
| SMP   | 29.47 $\pm$ 2.56                 | 14.22 $\pm$ 3.35  | 34.50 $\pm$ 8.59  | 70.66 $\pm$ 6.22                 | 13.15 $\pm$ 1.71                 | 41.49 $\pm$ 2.48 | 49.38 $\pm$ 2.56 | 60.36 $\pm$ 1.29                 |
| SSP   | 6.45 $\pm$ 2.03                  | 6.81 $\pm$ 5.98   | 15.11 $\pm$ 5.26  | 53.98 $\pm$ 5.42                 | 7.09 $\pm$ 2.06                  | 22.83 $\pm$ 2.93 | 25.32 $\pm$ 1.36 | 47.43 $\pm$ 4.89                 |
| CSP   | 4.04 $\pm$ 1.84                  | 4.72 $\pm$ 1.73   | 9.40 $\pm$ 1.47   | 48.03 $\pm$ 2.38                 | 0.23 $\pm$ 0.75                  | 8.18 $\pm$ 1.82  | 5.77 $\pm$ 3.50  | <b>12.31<math>\pm</math>0.52</b> |
| SPP   | 19.50 $\pm$ 3.08                 | 6.61 $\pm$ 1.18   | 15.95 $\pm$ 4.72  | 64.71 $\pm$ 3.18                 | 9.82 $\pm$ 2.10                  | 10.64 $\pm$ 5.04 | 16.14 $\pm$ 2.89 | 67.10 $\pm$ 2.40                 |
| cTHP  | 25.26 $\pm$ 1.02                 | 12.35 $\pm$ 0.48  | 27.82 $\pm$ 0.23  | 64.20 $\pm$ 0.33                 | 6.90 $\pm$ 0.25                  | 9.46 $\pm$ 1.09  | 9.23 $\pm$ 2.28  | 23.07 $\pm$ 3.02                 |
| cTMP  | 18.46 $\pm$ 0.32                 | 15.22 $\pm$ 0.60  | 35.13 $\pm$ 3.04  | 65.00 $\pm$ 5.95                 | 5.19 $\pm$ 0.64                  | 19.24 $\pm$ 2.14 | 22.68 $\pm$ 1.20 | 30.67 $\pm$ 1.23                 |
| cTVP  | 49.27 $\pm$ 3.60                 | 27.98 $\pm$ 2.75  | 57.56 $\pm$ 1.54  | 68.71 $\pm$ 2.61                 | 29.26 $\pm$ 2.47                 | 41.76 $\pm$ 1.45 | 33.77 $\pm$ 9.07 | 56.45 $\pm$ 2.45                 |
| cTiHP | 25.27 $\pm$ 3.37                 | 4.78 $\pm$ 3.33   | 24.56 $\pm$ 2.29  | 55.52 $\pm$ 0.07                 | 10.19 $\pm$ 1.35                 | 17.82 $\pm$ 0.94 | 18.53 $\pm$ 0.16 | 30.20 $\pm$ 1.15                 |
| cTiMP | 35.60 $\pm$ 1.44                 | 11.73 $\pm$ 3.05  | 45.93 $\pm$ 0.69  | 64.45 $\pm$ 10.55                | 7.97 $\pm$ 1.26                  | 32.70 $\pm$ 5.18 | 58.65 $\pm$ 0.91 | 40.76 $\pm$ 0.05                 |
| cTiVP | 51.30 $\pm$ 2.45                 | 27.95 $\pm$ 3.64  | 38.60 $\pm$ 3.22  | 65.63 $\pm$ 0.82                 | 19.09 $\pm$ 1.07                 | 18.56 $\pm$ 0.97 | 17.65 $\pm$ 1.84 | 26.15 $\pm$ 4.57                 |

**Table S2.** DPPH radical scavenging activity of the hydrolysates produced by crude-enzyme cocktails from different proteolytic bacterial strains. All data points are means  $\pm$  S.D. of three different replicates.

| 1.   | 2. Control        | 3. <i>Bacillus licheniformis</i> TKU004 | 5. <i>Paenibacillus macerans</i> TKU029 | 6. <i>Paenibacillus mucilaginosus</i> TKU032 | 8. <i>Paenibacillus</i> sp. TKU042 | 9. <i>Streptomyces thermocarboxydus</i> TKU045 | 11. <i>Streptomyces speibonae</i> TKU048 |
|------|-------------------|-----------------------------------------|-----------------------------------------|----------------------------------------------|------------------------------------|------------------------------------------------|------------------------------------------|
| THP  | 28.72 $\pm$ 6.60  | <b>53.88<math>\pm</math>2.28</b>        | <b>47.68<math>\pm</math>0.46</b>        | <b>51.10<math>\pm</math>3.97</b>             | <b>51.73<math>\pm</math>0.84</b>   | 35.97 $\pm$ 11.65                              | 72.04 $\pm$ 0.50                         |
| TVP  | 53.49 $\pm$ 0.73  | 54.99 $\pm$ 2.65                        | 54.01 $\pm$ 1.93                        | 55.58 $\pm$ 2.27                             | <b>56.27<math>\pm</math>0.85</b>   | 45.57 $\pm$ 5.96                               | 76.44 $\pm$ 3.29                         |
| TiHP | 22.30 $\pm$ 6.55  | 31.39 $\pm$ 4.65                        | 18.93 $\pm$ 3.03                        | 36.31 $\pm$ 9.32                             | 27.53 $\pm$ 8.13                   | <b>37.08<math>\pm</math>5.39</b>               | 68.38 $\pm$ 7.89                         |
| TiVP | 45.67 $\pm$ 0.90  | <b>52.35<math>\pm</math>5.34</b>        | 50.11 $\pm$ 4.05                        | <b>57.70<math>\pm</math>3.47</b>             | <b>52.02<math>\pm</math>3.86</b>   | 47.34 $\pm$ 4.65                               | <b>78.21<math>\pm</math>1.00</b>         |
| SHP  | 43.84 $\pm$ 3.32  | 41.12 $\pm$ 0.88                        | 34.92 $\pm$ 10.09                       | 40.70 $\pm$ 3.31                             | 47.67 $\pm$ 4.33                   | 38.23 $\pm$ 6.01                               | 75.55 $\pm$ 6.36                         |
| SSP  | 26.05 $\pm$ 5.43  | 13.55 $\pm$ 3.21                        | 20.09 $\pm$ 1.99                        | 31.65 $\pm$ 6.34                             | 27.51 $\pm$ 8.30                   | 27.76 $\pm$ 9.45                               | 72.64 $\pm$ 8.68                         |
| CSP  | 14.68 $\pm$ 10.60 | <b>31.08<math>\pm</math>0.71</b>        | 12.53 $\pm$ 11.98                       | 26.04 $\pm$ 11.43                            | 17.17 $\pm$ 9.31                   | <b>41.54<math>\pm</math>3.28</b>               | <b>60.01<math>\pm</math>4.88</b>         |
| SPP  | 20.42 $\pm$ 8.90  | 32.81 $\pm$ 4.56                        | 24.54 $\pm$ 7.71                        | 34.87 $\pm$ 8.67                             | 23.24 $\pm$ 8.07                   | <b>38.73<math>\pm</math>4.71</b>               | 69.39 $\pm$ 4.24                         |

**Table S3.** ABTS radical scavenging activity of the hydrolysates produced by crude-enzyme cocktails from different proteolytic bacterial strains. All data points are means  $\pm$  S.D. of three different replicates.

| 12. Control | 13. <i>Bacillus licheniformis</i> TKU004 | 16. <i>Paenibacillus macerans</i> TKU029 | 19. <i>Paenibacillus mucilaginosus</i> TKU032 | 21. <i>Paenibacillus</i> sp. TKU042 | 22. <i>Streptomyces thermocarboxydus</i> TKU045 | 24. <i>Streptomyces speibonae</i> TKU048 |
|-------------|------------------------------------------|------------------------------------------|-----------------------------------------------|-------------------------------------|-------------------------------------------------|------------------------------------------|
| THP         | 7.96 $\pm$ 1.21                          | 23.39 $\pm$ 1.43                         | 16.61 $\pm$ 2.64                              | 17.08 $\pm$ 4.40                    | 17.39 $\pm$ 3.96                                | 32.96 $\pm$ 2.64                         |
| TVP         | 58.35 $\pm$ 1.98                         | <b>77.59<math>\pm</math>3.85</b>         | <b>77.67<math>\pm</math>2.86</b>              | <b>73.70<math>\pm</math>2.75</b>    | <b>68.95<math>\pm</math>3.96</b>                | <b>72.30<math>\pm</math>0.11</b>         |
| TiHP        | 9.99 $\pm$ 1.43                          | 21.98 $\pm$ 1.87                         | 17.86 $\pm$ 3.74                              | 20.04 $\pm$ 1.32                    | 17.08 $\pm$ 1.54                                | 30.94 $\pm$ 0.22                         |
| TiVP        | 12.01 $\pm$ 2.31                         | 26.73 $\pm$ 6.82                         | 30.08 $\pm$ 2.75                              | 43.95 $\pm$ 11.78                   | 27.67 $\pm$ 0.44                                | 40.83 $\pm$ 10.02                        |
| SHP         | 41.22 $\pm$ 7.70                         | 70.19 $\pm$ 9.69                         | 56.64 $\pm$ 5.50                              | 44.10 $\pm$ 2.53                    | 42.00 $\pm$ 2.42                                | <b>73.23<math>\pm</math>5.17</b>         |
| SSP         | 5.78 $\pm$ 0.55                          | 36.55 $\pm$ 1.54                         | 38.11 $\pm$ 2.20                              | 31.10 $\pm$ 1.10                    | 33.35 $\pm$ 2.53                                | 48.07 $\pm$ 9.69                         |
| CSP         | 5.63 $\pm$ 2.09                          | <b>12.56<math>\pm</math>2.42</b>         | <b>6.41<math>\pm</math>1.21</b>               | <b>12.01<math>\pm</math>4.07</b>    | <b>9.06<math>\pm</math>2.31</b>                 | <b>21.05<math>\pm</math>0.11</b>         |
| SPP         | 6.72 $\pm$ 3.85                          | 47.76 $\pm$ 7.48                         | 59.99 $\pm$ 8.04                              | 32.03 $\pm$ 7.26                    | 38.18 $\pm$ 1.65                                | 54.62 $\pm$ 3.08                         |
